# Supplementary material for: Divergent adaptive strategies in vascular and bryophyte species: Intraspecific trait variation in cold scree slope microrefugia versus adjacent forests
Source: Research Square preprint supplement (doi:10.21203/rs.3.rs-8489971/v1), 2026-01-12
Supplement: Supplementary file 1 [file 4d3de45de0eb64e04bd5bdd4.docx]

|  |  | Mai bif | Rho fer | Vac myr | Hyl spl | Ple sch | Pti cri | Rhy lor | Rhy tri |
| --- | --- | --- | --- | --- | --- | --- | --- | --- | --- |
| Height | Test | Student | Welch | Welch | Student | Student | Student | Student | Student |
| df | 18.000 | 9.949 | 11.192 | 18.000 | 18.000 | 18.000 | 18.000 | 18.000 |
| t value | -2.404 | -4.845 | -2.971 | 1.314 | -2.843 | -1.806 | 0.000 | -0.629 |
| p value | **0.027** | **<0.001** | **0.013** | 0.205 | **0.011** | 0.088 | 1.000 | 0.537 |
| SLA | Test | Welch | Student | Welch | Welch | Student | Student | Student | Student |
| df | 10.084 | 18.000 | 9.130 | 9.774 | 18.000 | 18.000 | 18.000 | 18.000 |
| t value | -5.181 | -1.996 | 1.010 | -6.570 | 2.768 | -0.648 | -3.543 | 1.268 |
| p value | **<0.001** | 0.061 | 0.339 | **<0.001** | **0.013** | 0.525 | **0.002** | 0.221 |
| LDMC | Test | Student | Student | Welch | Welch | Student | Student | Student | Welch |
| df | 18.000 | 18.000 | 12.937 | 10.841 | 18.000 | 18.000 | 18.000 | 17.044 |
| t value | 5.927 | -0.889 | -0.366 | 7.086 | 3.657 | -0.062 | 0.316 | 5.318 |
| p value | **<0.001** | 0.386 | 0.720 | **<0.001** | **0.002** | 0.951 | 0.756 | **<0.001** |

Supplementary material 1: Detailed results of statistical test.
